# Supplementary material for: Antimicrobial Efficacy of a Vegetable Oil Plasticizer in PVC Matrices
Source: MDPI journal article supplement (doi:10.3390/polym16081046), 2024-04-10
Supplement: s1 [file s1]

## Supporting Information

### Article

#### Antimicrobial efficacy of a vegetable oil plasticizer in PVC matrices

Greta Bajetto<sup>1,2#</sup>, Sara Scutera<sup>1#</sup>, Francesca Menotti<sup>1</sup>, Giuliana Banche<sup>1</sup>, Giuseppe Chiaradia<sup>3</sup>, Caterina Turesso<sup>3</sup>, Marco De Andrea<sup>1,2</sup>, Marta Vallino<sup>4</sup>, Daan S. Van Es<sup>5</sup>, Matteo Biolatti<sup>1\*</sup>, Valentina Dell'Oste<sup>1</sup>, Tiziana Musso<sup>1</sup>

- <sup>1</sup> Department of Public Health and Pediatric Sciences, University of Turin, Turin, Italy  
greta.bajetto@unito.it (G.Baj.); sara.scutera@unito.it (S.S);  
francesca.menotti@unito.it (F.M.); giuliana.banche@unito.it (G.Ban.);  
marco.deandrea@unito.it (M.D.A.); matteo.biolatti@unito.it (M.B.);  
valentina.delloste@unito.it (V.D.O.); tiziana.musso@unito.it (T.M.)
- <sup>2</sup> Center for Translational Research on Autoimmune and Allergic Disease-CAAD, Novara, Italy
- <sup>3</sup> Fluos Sas, Busto Arsizio, Varese, Italy  
chiaradia@fluos.it (G.C.); turesso@fluos.it (C.T.)
- <sup>4</sup> Institute for Sustainable Plant Protection, CNR, Turin, Italy  
marta.vallino@ipsp.cnr.it (M.V.)
- <sup>5</sup> Wageningen Food & Biobased Research, Wageningen, The Netherlands.  
daan.vanes@wur.nl (D.S.V.E.)

# contributed equally

\* Correspondence: matteo.biolatti@unito.it; Tel.: +39-011-6705635

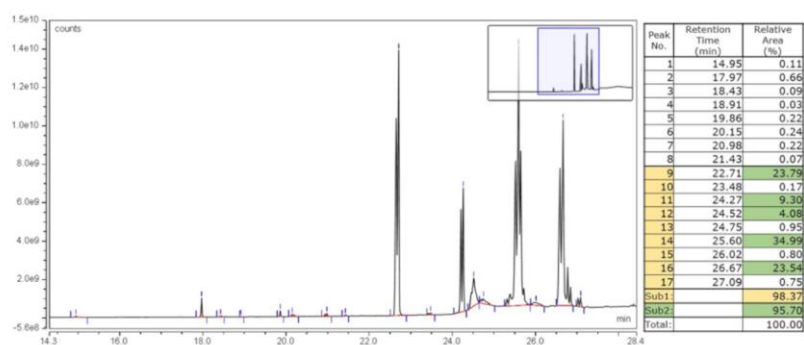

**Supplementary Figure. S1.** Analysis of ester content in GDE plasticizer by GC-MS. The ester content is based on peak areas. Sub 1 refers to the sum of main peaks (numbers 9, 11, 12, 14, 16) and peaks between main peaks (numbers 10, 13, 15, 17), while Sub2 refers to the main peaks only.

A)

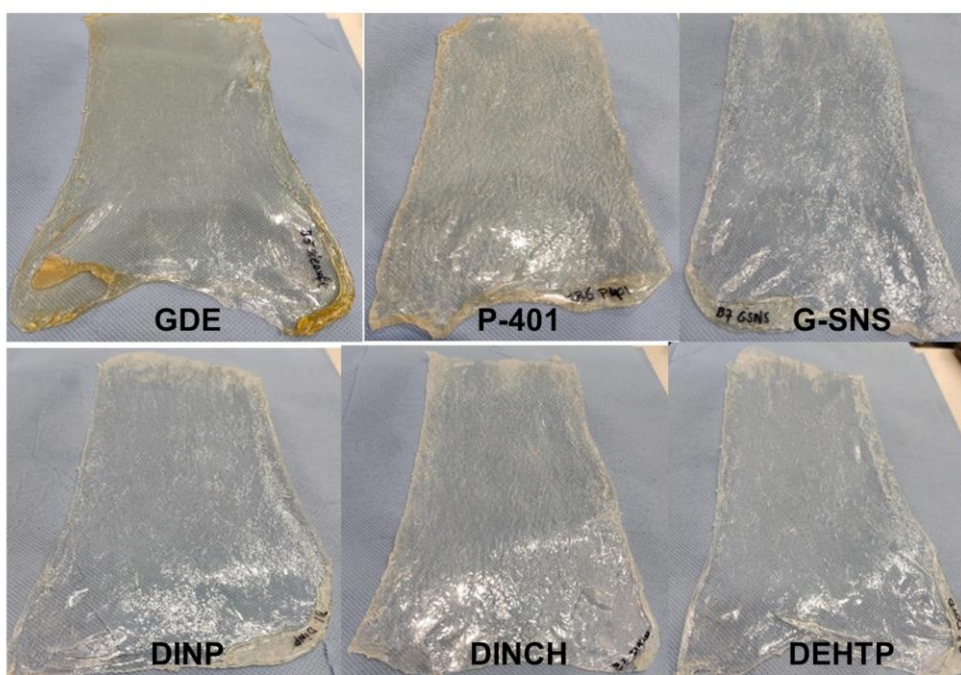

B)

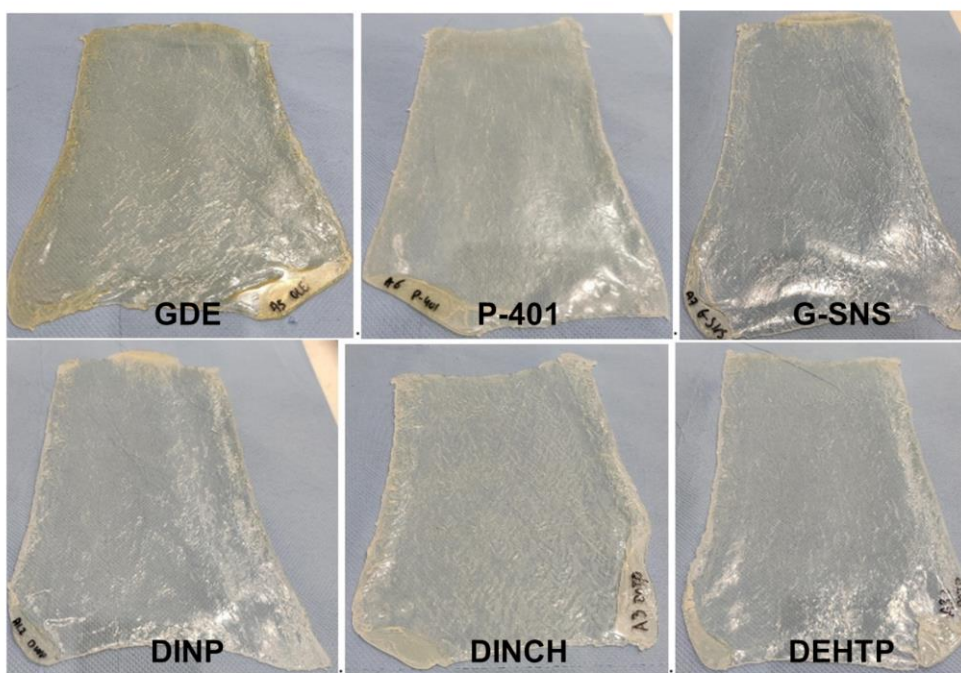

**Supplementary Figure. S2.** Physical appearance of roll-milled PVC sheets at concentrations of 40 (a) and 60 (b) phr.

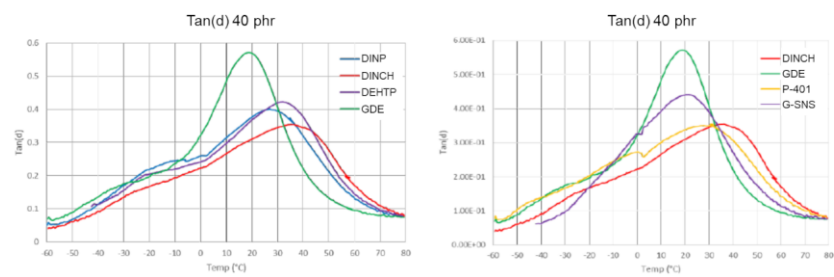

**Supplementary Figure. S3.** Comparison of the  $\tan\delta$  curves of 40 phr plasticized PVC compounds.
